# Supplementary material
Source: PubMed Central journal article supplement (PMC3315233)
Supplement: supp_tpc.111.095083_tpc095083supplemental.pdf [file supp_tpc.111.095083_tpc095083supplemental.pdf]

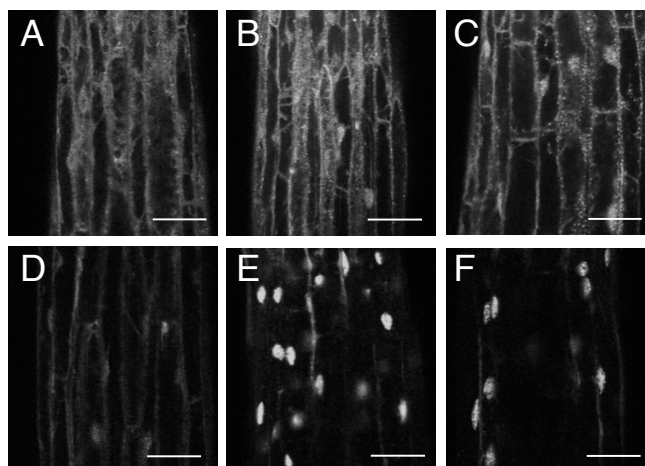

**Supplemental Figure 1. Subcellular localization of a constitutively localized phyA**

Subcellular localization of phyA-GFP and phyA-NLS-GFP. Dark grown *phyA* seedlings (4 – 5.9 mm length) transformed with PHYA-GFP or PHYA-NLS-GFP were analyzed by confocal laser scanning microscope. The seedlings were analyzed directly (dark) or after 1-4 hours irradiation with blue light ( $0.1 \mu \text{mol m}^{-2} \text{s}^{-1}$ ). A; phyA-GFP seedling in the darkness, B; phyA-GFP seedling after 1 hour blue light irradiation, C; phyA-GFP seedling after 2 hours blue light irradiation, D; phyA-GFP seedling after 4 hours blue light irradiation, E; phyA-NLS-GFP seedling in the darkness, F; phyA-NLS-GFP seedling after 4 hours blue light irradiation. Bar, 50  $\mu\text{m}$ .

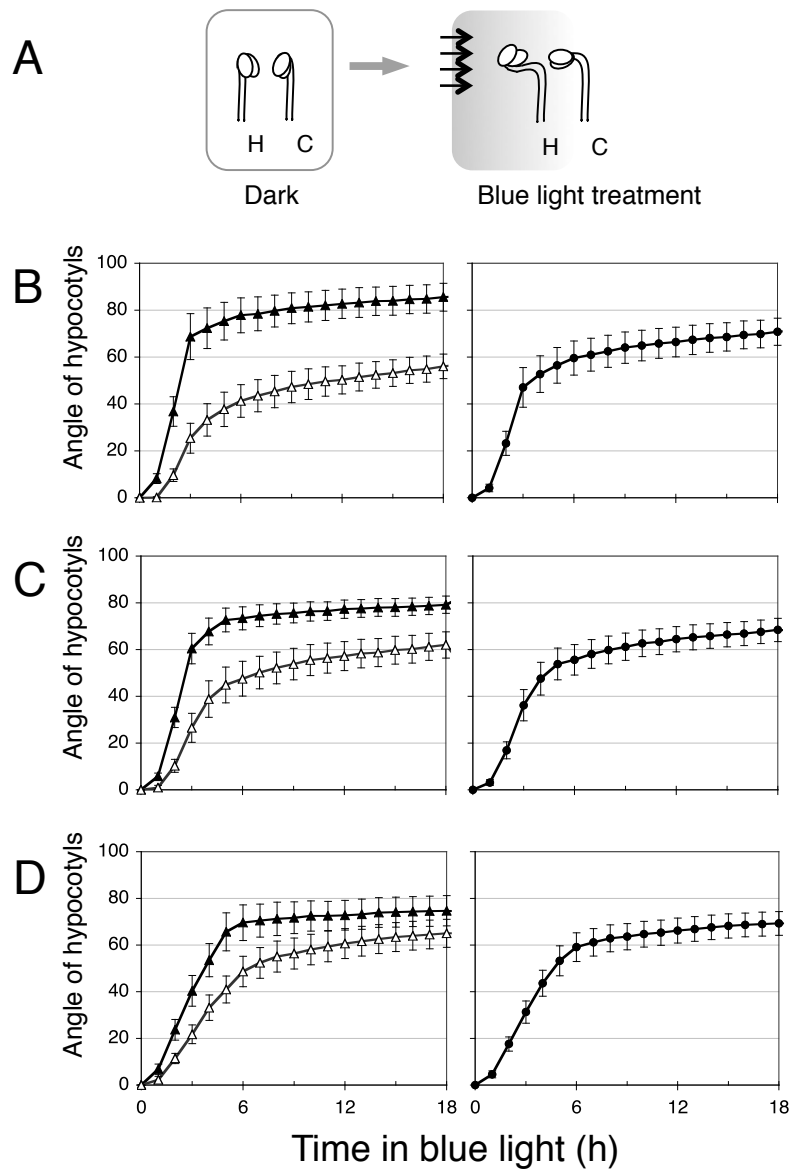

**Supplemental Figure 2. Phototropism kinetics depends on the length of the hypocotyl and the orientation of the cotyledons**

Dark grown seedlings were exposed unilateral blue light ( $0.1 \mu \text{mol m}^{-2} \text{s}^{-1}$ ) for 24 hours.

**A:** Schematic representation of the two positions of the cotyledons (C: cotyledon facing blue light, H: cotyledon in the opposite direction) relative to the incoming light.

**B :** Kinetic analysis of phototropism in seedling with a hypocotyl length of 1 - 3.9 mm. The left panel shows the kinetics for position H (full triangle) and C (open triangle) separately. The right panel shows the average data of seedlings with both positions. Each data are average with  $\pm 2 \times \text{SE}$  of hypocotyl angles ( $n=50$ , 25 hypocotyls of C and 25 of hypocotyls H).

**C:** As in B but with hypocotyl length between 4 - 5.9 mm.

**D:** As in B but with hypocotyl length between 6 - 8.9mm.

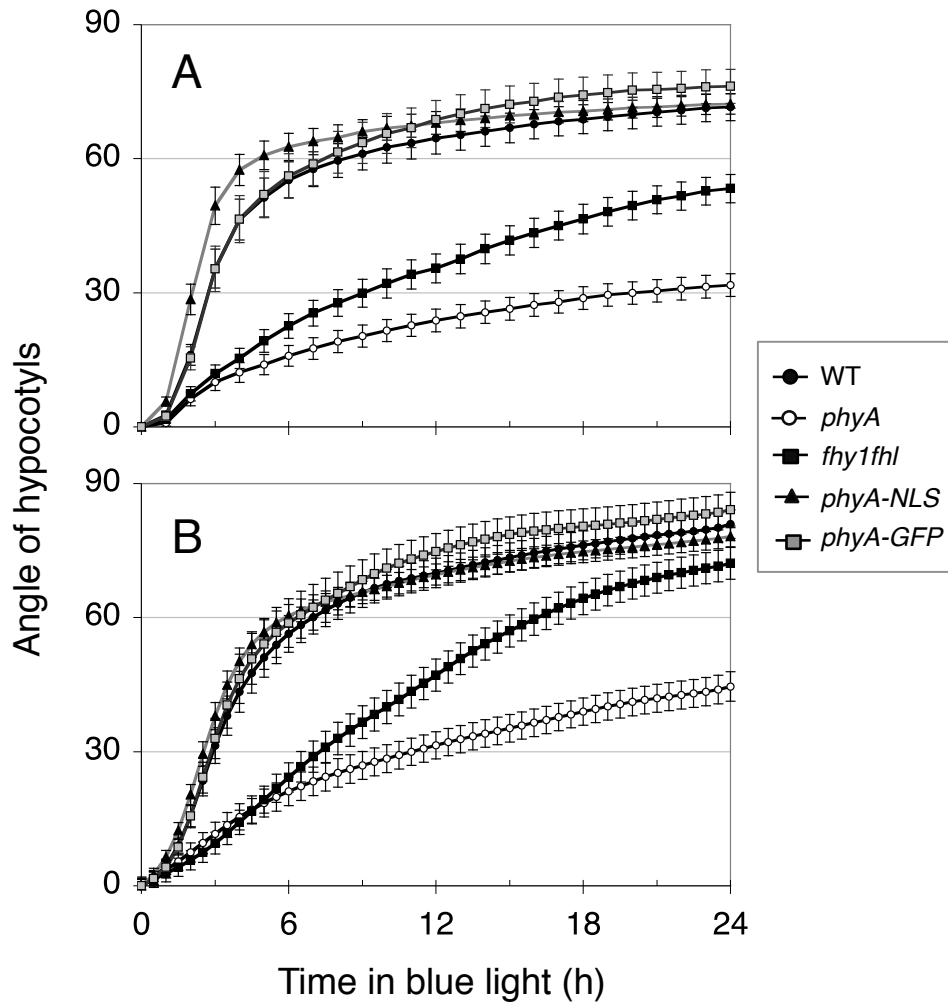

**Supplemental Figure 3. Comparison of phototropism kinetics by using manual measurement and semi-automatic measurement with same time-laps images**

Dark grown seedlings (4 – 5.9 mm length) were exposed unilateral blue light ( $0.1 \mu \text{mol m}^{-2} \text{s}^{-1}$ ) for 24 hours. The kinetics shows the total average of both cotyledon position with  $\pm 2 \times \text{SE}$ . All of data were collected more 30 each cotyledon position (WT: 46C+46H, *phyA*: 37C+37H, *fhy1fhl*: 34C+34H, *phyA-NLS*: 61C+ 61H, *phyA-GFP*: 33C+33H).

A: Phototropism kinetics by using Manual measurement with ImageJ

B: Phototropism kinetics by using Semi-automatic measurement (HypoPhen). Data for the WT, *phyA-NLS* and *phyA-GFP* are the same as those presented in figure 3.

*phyA-YFP*

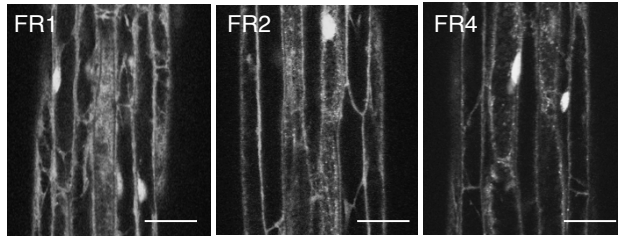

*phyA-YFP / fhy1fhl*

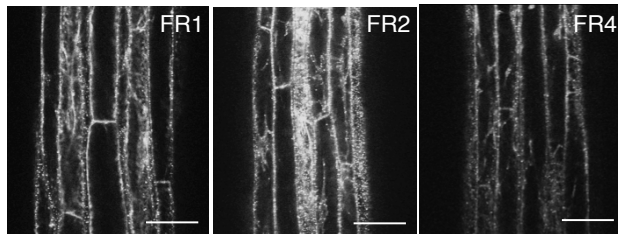

**Supplemental figure 4. *phyA* localization (*phyA-YFP*) in WT or *fhy1fhl* under far-red light**

Dark grown (4 – 5.9 mm length) *PHYA-YFP* in *phyA* and *fhy1fhl* seedlings were analyzed by confocal laser scanning microscopy. The seedlings were analyzed directly (dark) after 1, 2 or 4 hours irradiation with far-red light ( $5 \mu \text{mol m}^{-2} \text{s}^{-1}$ ). FR1, FR2 and FR4; 1, 2 or 4 hours far-red light treatment. Bar, 50  $\mu\text{m}$ .

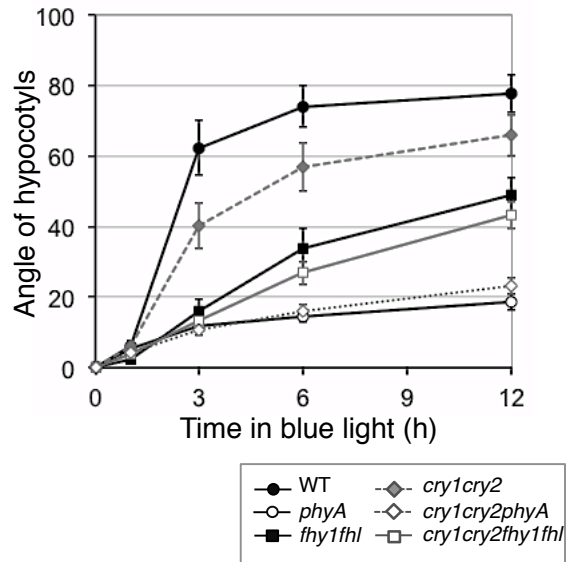

**Supplemental figure 5. Comparison of phototropism kinetics in WT, *phyA*, *fhy1fhl*, *cry1cry2*, *cry1cry2phyA* and *cry1cry2fhy1fhl* under low blue light**

Dark grown seedling (4 – 5.9 mm length) were exposed unilateral blue light ( $0.1 \mu \text{mol m}^{-2} \text{s}^{-1}$ ) for 12 hours. Each data show total average of both cotyledon position ( $n=20\text{C}+20\text{H}$ ) and  $\pm 2 \times \text{SE}$  of hypocotyl angles.
